1 **Up-regulation of autophagy by low concentration of salicylic acid delays**  
2 **methyl jasmonate-induced leaf senescence**

3 Runzhu Yin<sup>1</sup>, Jingfang Yu<sup>1</sup>, Yingbin Ji<sup>1,3</sup>, Jian Liu<sup>4</sup>, Lixin Cheng<sup>2\*</sup>, Jun Zhou<sup>1\*</sup>

4 1 MOE Key Laboratory of Laser Life Science & Institute of Laser Life Science, College of  
5 Biophotonics, South China Normal University, Guangzhou 510631, China

6 2 Department of Critical Care Medicine, Shenzhen People's Hospital, The Second Clinical  
7 Medicine College of Jinan University, Shenzhen 518020, China

8 3 Luoyang Tmaxtree Biotechnology Co., Ltd, Luoyang 471023, China

9 4 Fujian Provincial Key Laboratory of Plant Functional Biology, College of Life Sciences,  
10 Fujian Agriculture and Forestry University, Fuzhou 350002, China

11 **\*Correspondence:** Lixin Cheng, [easonlcheng@gmail.com](mailto:easonlcheng@gmail.com); Jun Zhou,  
12 [zhoujun@scnu.edu.cn](mailto:zhoujun@scnu.edu.cn)

13 **Running Title:** interaction network analysis reveals autophagy involved in LCSA signaling

14

15 **ABSTRACT**

16 Crosstalk between salicylic acid (SA) and jasmonic acid (JA) signaling plays an important  
17 role in molecular regulation of plant senescence. Our previous works found that SA could  
18 delay methyl jasmonate (MeJA)-induced leaf senescence in a concentration-dependent  
19 manner. Here, the effect of low concentration of SA (LCSA) application on MeJA-induced  
20 leaf senescence was further assessed. High-throughput sequencing (RNA-Seq) results  
21 showed that LCSA did not have dominant effects on the genetic regulatory pathways of  
22 basal metabolism like nitrogen metabolism, photosynthesis and glycolysis. The  
23 ClusterONE was applied to identify discrete gene modules based on protein-protein  
24 interaction (PPI) network. Interestingly, an autophagy-related (ATG) module was identified  
25 in the differentially expressed genes (DEGs) that exclusively induced by MeJA together  
26 with LCSA. RT-qPCR confirmed that the expression of most of the determined ATG genes  
27 were upregulated by LCSA. Remarkably, in contrast to wild type (Col-0), LCSA cannot  
28 alleviate the leaf yellowing phenotype in autophagy defective mutants (*atg5-1* and *atg7-2*)  
29 upon MeJA treatment. Confocal and western blot results showed that LCSA increased the  
30 number of autophagic bodies and autophagic flux during MeJA-induced leaf senescence.  
31 Collectively, our work revealed up-regulation of autophagy by LCSA as a key regulator to  
32 alleviate MeJA-induced leaf senescence.

33 **Key Words: autophagy; gene modules; jasmonic acid; leaf senescence; RNA-Seq;**  
34 **salicylic acid**

35

## 36 INTRODUCTION

37 Senescence in green plants is a complex and orderly regulated process that is crucial for  
38 transiting from nutrient assimilation to nutrient remobilization (Masclaux et al., 2000;  
39 Quirino et al., 2000; Lim et al., 2003; Yoshida, 2003; Schippers, 2015). During senescence,  
40 the most visible characteristic is leaf yellowing, which is the consequence of a succession  
41 of changes in cellular physiology including chlorophyll degradation and photosynthetic  
42 activity reduction (Lim et al., 2003; Yoshida, 2003). Chloroplast as an early senescence  
43 signaling response organelle, its dismantling plays an important role in the major nitrogen  
44 source recycling and remobilization (Avila-Ospina et al., 2014). The progression of leaf  
45 senescence can be prematurely induced by multiple environmental and endogenous  
46 factors, such as temperature, light, humidity and phytohormones (Lim et al., 2007).  
47 Hormone signaling pathways play roles at all the stages of leaf senescence, including the  
48 initiation, progression, and the terminal phases of senescence (Lim et al., 2007). Recent  
49 progresses show that senescence can be coordinately regulated by several  
50 phytohormones like cytokinins, ethylene, abscisic acid, salicylic acid (SA), and jasmonic  
51 acid (JA) (Gan and Amasino, 1995; van der Graaff et al., 2006; Hung and Kao, 2004; He  
52 et al., 2002; Morris et al., 2000). However, the detailed molecular mechanisms for these  
53 phytohormone signals in plant senescence remain poorly understood.

54 JA has been known as a key plant hormone for promoting senescence, based on the  
55 findings that exogenously applied methyl jasmonate (MeJA, methyl ester of JA) leads to a  
56 rapid loss of chlorophyll content and accompany with reduction of photochemical efficiency  
57 (Yue et al., 2012; Ji et al., 2016). Studies with JA-insensitive mutant *coronatine insensitive*  
58 *1 (coi1)* that exhibited defective senescence response to MeJA treatment (He et al., 2002),  
59 supporting the notion that JA signaling pathway is crucial for leaf senescence. Some other  
60 evidences indicate that SA is also involved in plant senescence (Morris et al., 2000; Chai  
61 et al., 2014). The concentration of endogenous SA increases to upregulate several  
62 senescence-associated genes during leaf senescence (Morris et al., 2000; Yoshimoto et  
63 al., 2009). However, such genetic regulatory mechanisms are abolished in plants defective  
64 in the SA signaling or biosynthetic pathway (*npr1* and *pad4* mutants, and *NahG* transgenic  
65 plants) (Morris et al., 2000). Crosstalk between MeJA and SA has been broadly  
66 documented in plant defense response, which commonly manifests as a reciprocal  
67 antagonism pattern (Thaler et al., 2012). Evidence suggests that antagonistic interactions  
68 between SA and MeJA modulate the expression of a senescence-specific transcription  
69 factor WRKY53, showing induced by SA, but repressed by MeJA (Miao and Zentgraf,

70 2007). Overall, mechanisms determining the specificity and coordination between SA and  
71 JA still need to be further explored.

72 Most of phytohormones have both stimulatory and inhibitory effects on the growth and  
73 metabolism of higher plants in a dose dependent manner. It seems that SA functions in the  
74 same way on the physiological and biochemical processes of plants (Ji et al., 2016;  
75 Pasternak et al., 2019). Low-concentration SA (hereafter as LCSA) at below 50 micromole  
76 ( $\mu\text{M}$ ) promotes adventitious roots and altered architecture of the root apical meristem,  
77 whereas high-concentration SA (greater than 50  $\mu\text{M}$ ) inhibits root growth (Pasternak et al.,  
78 2019). Interestingly, we previously demonstrated that MeJA-induced leaf senescence  
79 could be delayed by LCSA (1-50  $\mu\text{M}$ ), but accelerated when the concentration higher than  
80 100  $\mu\text{M}$  (Ji et al., 2016). Our other related works have verified such high dose of SA greatly  
81 activates NPR1 (nonexpressor of pathogenesis-related genes 1) translocation into nucleus,  
82 thereby promoting leaf senescence (Chai et al., 2014). Based on the dose dependent effect  
83 of SA, Pasternak et al. (2019) proposes that at low levels it acts as a developmental  
84 regulator and at high levels it acts as a stress hormone.

85 Autophagy is associated with plant senescence as defective mutants display early and  
86 strong yellowing leaf symptoms (Hanaoka et al., 2002; Xiong et al., 2005; Avila-Ospina et  
87 al., 2014; Li et al., 2014). Autophagy negatively regulates cell death by controlling NPR1-  
88 dependent SA signaling during senescence in Arabidopsis (Yoshimoto et al., 2009). The  
89 senescence process always accompanies with the equilibrium between oxidative and  
90 antioxidative capacities of the plant, which creates a characteristic oxidative environment  
91 resulting in the production of reactive oxygen species (ROS) and more toxic derivatives  
92 (Bhattacharjee, 2005). Moreover, autophagy is involved in the degradation of oxidized  
93 proteins under oxidative stress conditions in Arabidopsis (Xiong et al., 2007). Actually,  
94 there is a complicated interplay between ROS and autophagy, i.e., ROS can induce  
95 autophagy while autophagy be able to reduce ROS production (Signorelli et al., 2009). Our  
96 previous studies showed that LCSA application delays senescence by enhancing the  
97 activities of antioxidant enzymes and restricting reactive oxygen species (ROS)  
98 accumulation in MeJA-treated leaves (Ji et al., 2016). However, it is still unclear whether  
99 autophagy pathway is implicated in the LCSA-alleviated leaf senescence.

100 Here, the interactions between SA and MeJA in plant senescence were further  
101 investigated. By applying transcriptome and interaction network analysis, we identified  
102 autophagy-related (ATG) gene modules. In contrast to wild type (Col-0), LCSA cannot  
103 alleviate the leaf yellowing phenotype in autophagy defective mutants upon MeJA

104 treatment. Further results revealed that LCSA increased the number of autophagic bodies  
105 and autophagic flux during MeJA-induced leaf senescence. Collectively, our work sheds  
106 light on up-regulation of autophagy by LCSA is a key regulator to alleviate MeJA-induced  
107 leaf senescence.

## 108 **MATERIALS AND METHODS**

### 109 **Plant materials and hormone treatments**

110 Arabidopsis plants of wild-type (WT, Col-0), *atg5-1* (SAIL\_129\_B07), *atg7-2* (GK-655B06)  
111 and eYFP-ATG8e (Zhuang et al., 2013) were grown in a greenhouse at 22 °C with 16 h  
112 light photoperiod (120  $\mu\text{mol quanta}^{-2} \text{m}^{-2}$ ). Phytohormones treatment was performed as  
113 described by Ji et al (2016). Briefly, the 3rd and 4th rosette leaves from four weeks of plants  
114 were detached and incubated in 3 mM MES buffer (pH 5.8) containing 50  $\mu\text{M}$  methyl  
115 jasmonate (MeJA) and/or 10  $\mu\text{M}$  salicylic acid (SA). MeJA was prepared from a 50 mM  
116 stock solution in ethanol. Solutions without MeJA were supplemented with equal amounts  
117 of ethanol.

### 118 **Photochemical efficiency and chlorophyll content measurements**

119 The photochemical efficiency was measured with an Imaging-PAM Chlorophyll  
120 Fluorometer (PAM-MINI, Walz, Germany) followed the procedure described previously  
121 (Zhou et al., 2015). After dark-adapted for 1 h, parameters  $F_0$  (minimum fluorescence with  
122 PSII reaction centers fully open) and  $F_m$  (maximum fluorescence after dark adaptation)  
123 were acquired with a 0.8-s saturating pulse (4,000  $\mu\text{mol photons m}^{-2} \text{s}^{-1}$ ). The value of  
124  $F_v/F_m$  was calculated by the formulas  $(F_m - F_0)/F_m$ . Total Chlorophyll was determined as  
125 reported by Coombs et al. (1987). Chlorophyll was extracted by immersion in 90% ethanol  
126 at 65 °C for 2 h. The absorbance at 664 nm and 647 nm were determined with a Lambda  
127 35 UV/VIS Spectrometer (Perkin-Elmer) (Zeng et al., 2016). The concentration per fresh  
128 weight of leaf tissue was calculated according to the formula: micromoles of chlorophyll  
129 per milliliter per gram fresh weight =  $7.93(A_{664}) + 19.53(A_{647})$ . The percentages of  $F_v/F_m$   
130 and chlorophyll content are calculated relative to the initial levels of samples before  
131 treatment (time zero).

### 132 **RNA-Seq analysis**

133 Detached 3rd and 4th rosette leaves from 4-week old plants were immersed in 3 mM MES  
134 buffer (pH 5.8) containing 10  $\mu\text{M}$  SA, 50  $\mu\text{M}$  MeJA, and MeJA together with SA for 24 h.  
135 Total RNA for RNA-Seq was extracted from leaves using a Hipure plant RNA kit (Magen,

136 China). Purified RNA was analyzed either using a ND-1000 Nanodrop (Thermo Fisher,  
137 USA), or by agarose gel electrophoresis to determine the RNA quantity. Those RNA  
138 samples with no smear seen on agarose gels, a 260/280 ratio above 2.0, and RNA integrity  
139 number greater than 8.0 were used. For RNA-Seq analysis, we mixed three replication  
140 samples for each treatment into one, and total RNA samples were then sent to RiboBio  
141 Co., Ltd (Guangzhou, China) for sequencing. The NEBNext Poly(A) mRNA Magnetic  
142 Isolation Module (NEB, USA) was used for mRNA purification. The Ultra II RNA Library  
143 Prep Kit for Illumina was used for RNA library construction. The libraries were sequenced  
144 as 50-bp single end reads using Illumina HiSeq2500 according to the manufacturer's  
145 instructions.

#### 146 **Differential Expression Analysis**

147 Raw read count of each gene was generated using HTSeq with union-count mode (Love  
148 et al., 2014). After normalization by Reads Per Kilobase per Million mapped reads (rpkm),  
149 normalized read count table was used for determining differentially expressed genes  
150 (DEGs) (Anders and Huber, 2010; Cheng et al., 2016a, 2016b), which were defined as  
151 those with 2-fold changes. Fold change was calculated using  $\log_2$  (normalized read  
152 count+1). An R package *clusterprofiler* was used to perform the functional category  
153 analysis to detect the significantly enriched Gene Ontology (GO) terms (Cheng and Leung,  
154 2018a, and 2018b). Significantly enriched GO terms were selected by a threshold of  $p \leq$   
155 0.05. Protein-protein interaction (PPI) data was obtained from the STRING database (v.10,  
156 <http://string-db.org>) (Szklarczyk et al., 2014). To construct a high-confidence network, only  
157 the PPIs with confidence scores larger than 0.7 were considered in this work. ClusterONE  
158 was adopted for the identification of protein clusters or functional modules using default  
159 parameters as described previously (Cheng et al., 2017; Cheng et al., 2019). The protein  
160 modules including five or more than five members and having connection density over 0.5  
161 are defined as modules.

#### 162 **RT-qPCR**

163 Total RNA was isolated using Eastep Super RNA Kit (Promega, Shanghai, China) and  
164 genomic DNA was removed using DNase I. 1  $\mu\text{g}$  of RNA was used to make cDNA with the  
165 GoScript™ Reverse Transcription System (Promega, Shanghai, China). For qPCR 10  $\mu\text{L}$   
166 of Green-2-Go 2X qPCR-S Mastermix (Sangon, Shanghai, China) and 1  $\mu\text{L}$  of cDNA (100  
167 ng/ $\mu\text{L}$ ) for a total of 20  $\mu\text{L}$  was used in each well. Real-time PCR was done on a CFX  
168 Connect Real-Time System (BioRad) at 95 °C for 2 mins, and 45 cycles of 95 °C for 15 s,

169 55 °C for 30s, and 72 °C for 30s followed by a melting curve analysis. For each sample 3  
170 biological reps were used and repeated 3 times for technical replication. qPCR was  
171 analyzed using the  $\Delta\Delta C_t$  method. Primers for qPCR were showed in Table S2. Statistical  
172 significance was determined using Duncan's multiple range test.

### 173 **Confocal microscopy**

174 Detached 3rd and 4th rosette leaves were immersed in 3 mM MES buffer (pH 5.8)  
175 containing 50  $\mu$ M MeJA and/or 10  $\mu$ M SA for 24 h. Confocal images were captured with  
176 63x (numerical aperture [NA], 1.4) objective using an LSM 880 microscope (Zeiss). For  
177 quantification of autophagic puncta, randomly selected 15 to 20 images for each three  
178 independent experiments were quantified with ImageJ. All images were collected with the  
179 same settings determined prior to the experiment to yield nonsaturating conditions.

### 180 **Western Blot**

181 Treatment leaves were ground in liquid nitrogen and extracted with the lysis buffer (50 mM  
182 Tris-HCl, pH 7.5, 150 mM NaCl, 1 mM EDTA, 1% SDS, and 1x Protease Inhibitor Cocktail  
183 (MCE, Medchemexpress)). The total lysate was centrifuged at 12,000g for 20 min at 4°C.  
184 Protein extracts were separated using SDS-PAGE and then western blotted. Blots were  
185 stained with Ponceau S to confirm even loading. A 1:10000 dilution of monoclonal rabbit  
186 anti-GFP antibody (HuaAn Biotechnology, Hangzhou, China) was used. Subsequently,  
187 blots were washed and incubated with an anti-Rabbit IRDye® 800CW conjugated  
188 secondary antibody (Abcam).

## 189 **RESULTS**

### 190 **LCSA delays MeJA-induced leaf senescence**

191 Our previous results indicated that SA delays MeJA-induced leaf senescence in a  
192 concentration-dependent manner, showing accelerated by high SA concentrations (greater  
193 than 100  $\mu$ M) but attenuated by low SA concentrations (1-50  $\mu$ M) (Ji et al., 2016). On this  
194 basis, 10  $\mu$ M SA, the most effective concentration according to Ji et al., 2016, was selected  
195 as low working solution to further confirm the effect of LCSA. As shown in Figure 1, in  
196 contrast to control, LCSA did not appear to have a discernible effect on senescence.  
197 Leaves incubated with MeJA (50  $\mu$ M) were greatly turned yellow after 5 days treatment.  
198 However, when MeJA worked together with LCSA (MeJA+LCSA), the leaf yellowing was  
199 alleviated (Figure 1A). Consistent with the visible phenotype, the photochemical efficiency



200 Fv/Fm and loss of chlorophyll content in the leaves combined treatment with LCSA and  
201 MeJA was less severe relative to that of the leaves treated with MeJA alone (Figure 1B  
202 and 1C). These physiological and biochemical data is consistent with our previous finding  
203 that LCSA provide protection against senescence caused by MeJA.

#### 204 **Expression patterns of genes in LCSA-induced delayed leaf senescence**

205 To investigate the genome-wide effect of LCSA on MeJA-induced gene expression  
206 changes, we performed RNA-sequencing experiments. Since gene transcription regulation  
207 occurs prior to visible phenotype, leaves treatment with phytohormones at 1 d were  
208 selected according to our previous study (Ji et al., 2016). Totally, 408, 2536 and 2800 genes  
209 displayed at least 2-fold changes in the expression level of LCSA, MeJA, and MeJA+LCSA  
210 -treated leaves, respectively, relative to control leaves (Figure 2A). Of these, the number  
211 of differentially expressed genes (DEGs) of LCSA alone were greatly less than that in MeJA  
212 or MeJA+LCSA treatment group, in consistent with the inconspicuous phenotype between  
213 SA and control leaves (Figure 1). Therefore, our study is mainly concentrated on the  
214 differential expression of gene between MeJA and MeJA+LCSA.

215 To interpret the upregulated and down-regulated DEGs resulting from the MeJA and  
216 MeJA+LCSA treatment, functional enrichment of Gene Ontology (GO) terms was  
217 performed using the hypergeometric test (P-value < 0.05). The analysis of biological  
218 process GO terms illustrated that most of the induced DEGs related to amino acid  
219 (Glutathione, Cyanamino acid, arginine, proline, alanine, aspartate and glutamate)  
220 metabolism, nitrogen metabolism, and flavonoid biosynthesis, whereas, the repressed  
221 DEGs mainly related to carbon metabolism, photosynthesis, and glycolysis (Figure 2B).  
222 These features of nitrogen and carbohydrate metabolism are consistent with the senescing  
223 phenotype of leaves. In contrast to MeJA alone, unexpectedly, LCSA together with MeJA  
224 treatment did not make much differences on the enriched biological processes (Figure 2C).  
225 The heatmap illustrated the top 50 up-regulated and down-regulated DEGs, which also  
226 revealed an extremely similar expression pattern between the DEGs of MeJA and  
227 MeJA+LCSA treatment (Figure 2D). These results indicated that LCSA does not appear to  
228 have dominant effects on the genetic regulatory network of basal metabolism like nitrogen  
229 metabolism, photosynthesis, and glycolysis.

#### 230 **Network analysis identifies autophagy-related gene module**

231 Since the enrichment analysis only provided undifferentiated biological processes about  
232 basal metabolism, network analysis was conducted using DEGs that induced by MeJA and



233 MeJA+LCSA, respectively. The protein-protein interactions (PPI) were collected from the  
234 STRING database, and only the PPIs with confidence scores higher than 0.7 were selected,  
235 resulting in a high confidence network with 719964 interactions and 17372 proteins.  
236 ClusterONE was used to identify functional protein modules, which were defined by the  
237 protein clusters including five or more than five members and having connection density  
238 over 0.5 (Cheng et al., 2019). According to such screening specifications, we identified 15  
239 gene modules in MeJA treatment group and 16 gene modules in MeJA+LCSA group,  
240 respectively (Figure S1 and S2). Of these, six gene modules were specially detected in the  
241 MeJA treatment group (Figure S3). Interestingly, MeJA together with SA exclusively  
242 induced seven gene modules, covering genes involved in autophagy-related (ATG)  
243 pathway, phytohormone response, ATP-binding cassette transporters, aquaporins, and  
244 flavonoid biosynthesis (Figure 3A). In this context, autophagy is an essential intracellular  
245 degradation system that plays important roles in nutrient remobilization during leaf  
246 senescence (Avila-Ospina et al., 2014). We found that the transcript abundance for ATG  
247 proteins (ATG4, ATG8, ATG9, and ATG12) was differentially sensitive to the MeJA+LCSA  
248 treatment. From the enriched biological processes and molecular functions, we observed  
249 that these ATGs are the core components that contribute to autophagosome mature and  
250 biogenesis (Figure 3B and 3C). Collectively, these results suggest a framework in which  
251 MeJA together with LCSA regulates the abundance of specific gene network, such as the  
252 autophagy process.

253 We next investigated whether the autophagy pathway was involved in LCSA-delayed  
254 leaf senescence. Ten ATG genes (ATG4A, ATG4B, ATG5, ATG6, ATG7, ATG8A, ATG8E,  
255 ATG8H, ATG12A, and ATG12B) that implemented in autophagosome formation were  
256 examined by RT-qPCR (Figure 4). In contrast to MeJA alone, most of these determined  
257 ATG genes, except for ATG8A and ATG8E, were up-regulated by the combined treatment  
258 group (MeJA+LCSA). The differential gene expression of ATG8 isoforms is possible due  
259 to they have different expression pattern in distinct tissues (Hanaoka et al., 2002).  
260 Interestingly, it should be mentioned that MeJA together with LCSA did not stimulate a  
261 much more increase in gene expression compared with control, especially LCSA treatment  
262 (Figure 4). These results indicate that restoration of ATG genes expression is closely  
263 related to LCSA-delayed leaf senescence.

#### 264 **SA-delayed leaf senescence is dependent on a functional autophagy pathway**

265 To further resolve whether autophagy pathway was crucial for LCSA-delayed leaf  
266 senescence, two autophagy defective mutants (*atg5-1* and *atg7-2*), that involved in ATG8

267 lipidation during phagophore elongation (Feng et al., 2014), were analyzed upon LCSA  
268 and/or MeJA treatment. In contrast to wild type (Col-0), leaves from *atg5-1* and *atg7-2*  
269 mutants were showed much more yellowing after incubated with MeJA for 5 days (Figure  
270 5A). As expect, the leaf yellowing phenotype was not alleviated when MeJA worked  
271 together with LCSA (Figure 5A). Consistently, the photochemical efficiency Fv/Fm in the  
272 *atg5-1* and *atg7-2* mutant leaves treated with MeJA+LCSA was not restored relative to that  
273 of the leaves treated with MeJA (Figure 5B). Similarly, none of the two mutants had  
274 recovered relative chlorophyll content as the Col-0 after combined treatment with MeJA  
275 and LCSA (Figure 5C). These genetic results clearly illustrated that the protection against  
276 MeJA-induced senescence by LCSA is dependent on a functional autophagy pathway.

### 277 **SA increases autophagy activity upon MeJA-induced leaf senescence**

278 Since autophagy pathway was verified involved in LCSA-delayed leaf senescence, we next  
279 further determined the detailed autophagy activity. Wild-type Arabidopsis plants expressing  
280 the eYFP-ATG8e fusion protein were subjected to LCSA and/or MeJA treatment, and the  
281 effects of LCSA on autophagy activity were analyzed by confocal microscopy of the YFP  
282 fluorescence. In control and LCSA treatment conditions, we observed a few fluorescent  
283 punctate structures that were identified previously as ATG8-tagged autophagosomes (or  
284 autophagic bodies) (Yoshimoto et al., 2004; Contento et al., 2005; Thompson et al., 2005).  
285 Incubation of MeJA alone induced a slightly increase in accumulation of autophagic bodies  
286 (Figure 6A). However, when the detached leaves were subjected to combined treatment  
287 with MeJA and LCSA, there was a greatly increase in the fluorescent vesicles (Figure 6A).  
288 The statistical results showed that the number of autophagic bodies was more than 2-fold  
289 higher in MeJA+LCSA group than that of treatment with MeJA alone (Figure 6B). Western  
290 blot analysis also indicated that MeJA together with SA treatment enhanced autophagic  
291 flux, showing a decrease in eYFP-ATG8 compared with other treatments (Figure 6C).  
292 Taken together, our observations collectively suggest that LCSA activates the autophagy  
293 activity to delay MeJA-induced leaf senescence.

### 294 **DISCUSSION**

295 As the final stage of leaf development, leaf senescence is a complex process that involves  
296 thousands of genes and multiple layers of regulation. Mechanisms governing the specificity  
297 regulation of phytohormones and output gene expression are therefore of great interest.  
298 The primary objective of the work is to further explore the crosstalk between SA and JA  
299 signaling in regulating plant leaf senescence. We have concentrated on examining the

300 mechanisms likely to underpin changes in the transcriptome in response to LCSA and/or  
301 MeJA. Specifically, an autophagy module was identified from the DEGs that exclusively  
302 induced by MeJA together with SA (Figure 3). Further results demonstrate that the  
303 upregulation of autophagy by LCSA serves important function in alleviating MeJA-induced  
304 leaf senescence (Figure 5 and 6).

305 Previously, we found that SA delays MeJA-induced leaf senescence in a concentration  
306 dependent manner (Ji et al, 2016). The dosage-dependent effect of SA also has been  
307 reported in plant root meristem regulation. SA at low levels (below 50  $\mu$ M) promotes  
308 adventitious roots and alters architecture of the root apical meristem, whereas high-  
309 concentration SA (>50  $\mu$ M) inhibits root growth (Pasternak et al., 2019). Such  
310 discrepancies are probably due to SA acts as a developmental regulator at low levels, but  
311 acts as a stress hormone at high levels (Pasternak et al., 2019). Interestingly, RNA-Seq  
312 results showed that the number of DEGs in LCSA alone treatment were less than MeJA or  
313 LCSA and MeJA combined treatment group (Figure 2A), which consistent with LCSA itself  
314 did not have a discernible effect on senescence, showing the inconspicuous phenotype  
315 between LCSA and control leaves (Figure 1). Moreover, in contrast to MeJA alone, LCSA  
316 together with MeJA treatment did not make much differences on the biological process of  
317 GO terms (Figure 2C). These results indicated that LCSA at low level is more likely function  
318 as a signaling regulator, which does not have a marked impact on the basal metabolism at  
319 least at the genetic regulatory level.

320 Autophagy promotes cell survival by adapting cells to stress conditions both in plants  
321 and mammals. Recent reverse-genetic studies have revealed that autophagy is closely  
322 associated with plant senescence, and autophagy defective mutants like *atg2*, *atg5* and  
323 *atg7* all showed early yellowing leaf symptoms (Doelling et al., 2002; Yoshimoto et al.,  
324 2009). SA is one of the most promising phytohormones that contribute to the induction of  
325 autophagy under stress. It has previously been reported that autophagy negatively  
326 regulates cell death by controlling NPR1-dependent SA signaling during senescence in  
327 Arabidopsis (Yoshimoto et al., 2009). Here, the ClusterONE was applied to identify discrete  
328 gene modules based on PPI network. We identified several modules including autophagy-  
329 related network in DEGs that exclusively induced by MeJA together with LCSA (Figure 3A).  
330 Importantly, the protection against MeJA-induced senescence by LCSA was abolished in  
331 autophagy defective mutant *atg5-1* and *atg7-2* (Figure 5). These data strongly suggest an  
332 important role for autophagy in LCSA-alleviated leaf senescence. Notably, unlike the  
333 greatly increase of autophagic bodies induced by MeJA+LCSA, autophagosomes under

334 LCSA alone treatment were not statistically significant when compared with control (Figure  
335 6). Nevertheless, it is worth pointing out that SA at 100  $\mu$ M, a high-concentration that could  
336 promote leaf senescence based on our previous study (Chai et al., 2016), greatly induced  
337 autophagic structures formation (Figure S4). In this context, we speculate that LCSA might  
338 be function like a priming regulator, which could initiate signal amplification and lead to a  
339 robust activation of stress response upon MeJA treatment. Actually, the priming induced  
340 by some plant activators (e.g.  $\beta$ -aminobutyric acid, and thiamine) are dependent on SA  
341 signaling (Ahn et al., 2005; Jung et al., 2009; Zhou et al., 2013). It would be interesting to  
342 test the priming effect of LCSA on leaf senescence in future research.

343 In summary, this study further investigated the interactions between SA and MeJA in  
344 plant senescence. Several modules including an autophagy-related (ATG) cluster were  
345 identified by analyzing the transcriptome data and protein interaction networks. Our results  
346 showed that LCSA could upregulate autophagy to alleviate leaf senescence when  
347 combined treatment with MeJA. This was confirmed by founding that LCSA cannot alleviate  
348 the leaf yellowing phenotype in autophagy defective mutants upon MeJA treatment.  
349 Collectively, our work reveals LCSA tend to function as a signaling regulator to upregulate  
350 autophagy pathway, which serves as an important cellular mechanism responsible for  
351 alleviation of MeJA-induced leaf senescence.

#### 352 **Data availability**

353 RNA-seq data were deposited in the Sequence Read Archive (SRA) database  
354 <https://www.ncbi.nlm.nih.gov/sra> with accession no. PRJNA578602.

#### 355 **AUTHOR CONTRIBUTIONS**

356 JZ and LC designed the research. RY, JY, and YJ conducted the experiments. RY, JL, JZ  
357 and LC analyzed data. JZ and LC wrote the manuscript. All authors read and approved the  
358 manuscript.

#### 359 **ACKNOWLEDGEMENTS**

360 Thanks for Professor Liwen Jiang (the Chinese University of Hong Kong) for giving the  
361 Arabidopsis seeds materials *atg5-1*, *atg7-2* and eYFP-ATG8e. Thanks for Yang Lv  
362 (Fengyuan biotechnology co. LTD, Shanghai, China) for the valuable suggestions for this  
363 manuscript. This work was supported by National Science Foundation of China (NSFC)  
364 (31600288); Guangdong Provincial Science and Technology Project (2016A020210127);  
365 SCNU Youth Teacher Research and Development Fund Project (671075); Scientific  
366 Research Projects of Guangzhou (201805010002).

#### 367 **CONFLICTS OF INTEREST**

368 The authors declare no conflict of interest.

## 369 REFERENCES

- 370 Anders, S., Huber, W. (2010). Differential expression analysis for sequence count data.  
371 Genome Biol. 11(10), R106. doi: 10.1186/gb-2010-11-10-r106
- 372 Ahn, I. P., Kim, S., Lee, Y. H., Suh, S. C. (2007). Vitamin B1-induced priming is  
373 dependent on hydrogen peroxide and the NPR1 gene in Arabidopsis. Plant Physiol.  
374 143(2), 838-848. doi: 10.1104/pp.106.092627
- 375 Avila-Ospina, L., Moison, M., Yoshimoto, K., Masclaux-Daubresse, C. (2014). Autophagy,  
376 plant senescence, and nutrient recycling. J. Exp. Bot. 65(14), 3799-3811. doi:  
377 10.1093/jxb/eru039
- 378 Bhattacharjee, S. (2005). Reactive oxygen species and oxidative burst: roles in stress,  
379 senescence and signal transduction in plants. Curr. Sci. 89, 1113-1121.
- 380 Chai, J., Liu, J., Zhou, J., Xing, D. (2014). Mitogen-activated protein kinase 6 regulates  
381 NPR1 gene expression and activation during leaf senescence induced by salicylic  
382 acid. J. Exp. Bot. 65(22), 6513-6528. doi: 10.1093/jxb/eru369
- 383 Cheng, L., & Leung, K. S. (2018a). Identification and characterization of moonlighting  
384 long non-coding RNAs based on RNA and protein interactome. Bioinformatics,  
385 34(20), 3519-3528. doi: 10.1093/bioinformatics/bty399
- 386 Cheng, L., & Leung, K. S. (2018b). Quantification of non-coding RNA target localization  
387 diversity and its application in cancers. J Mol. Cell Biol. 10(2), 130-138. doi:  
388 10.1093/jmcb/mjy006
- 389 Cheng, L., Liu, P., Leung, K. S. (2017). SMILE: a novel procedure for subcellular module  
390 identification with localisation expansion. IET Syst. Biol. 12(2), 55-61. doi:  
391 10.1049/iet-syb.2017.0085
- 392 Cheng, L., Liu, P., Wang, D., Leung, K. S. (2019). Exploiting locational and topological  
393 overlap model to identify modules in protein interaction networks. BMC  
394 bioinformatics, 20(1), 23. doi: 10.1186/s12859-019-2598-7
- 395 Cheng, L., Lo, L. Y., Tang, N. L., Wang, D., & Leung, K. S. (2016a). CrossNorm: a novel  
396 normalization strategy for microarray data in cancers. Sci. Rep. 6, 18898. doi:  
397 10.1038/srep18898
- 398 Cheng, L., Wang, X., Wong, P. K., Lee, K. Y., Li, L., Xu, B., et al. (2016b). ICN: a  
399 normalization method for gene expression data considering the over-expression of  
400 informative genes. Mol. BioSyst. 12(10), 3057-3066. doi: 10.1039/c6mb00386a
- 401 Coombs, J., G. Hind, R. C. Leegood, L. L. Tieszen and A. Vonshak (1987). Analytical  
402 Techniques. In: Techniques in Bioproductivity and photosynthesis 2nd Edition. (Eds)  
403 J. Coombs, D. O. Hall, S. P. Long and J. M. O. Scurlock. 219-220. Pergamon Press.
- 404 Doelling, J. H., Walker, J. M., Friedman, E. M., Thompson, A. R., Vierstra, R. D. (2002).  
405 The APG8/12-activating enzyme APG7 is required for proper nutrient recycling and  
406 senescence in Arabidopsis thaliana. J. Biol. Chem. 277(36), 33105-33114.
- 407 Feng, Y., He, D., Yao, Z., & Klionsky, D. J. (2014). The machinery of macroautophagy.  
408 Cell Res. 24(1), 24-41. doi: 10.1038/cr.2013.168
- 409 Gan S, Amasino RM. 1995. Inhibition of leaf senescence by autoregulated production of  
410 cytokinin. Science 270:1986-1988. doi: 10.1126/science.270.5244.1986
- 411 Ji, Y., Liu, J., Xing, D. (2016). Low concentrations of salicylic acid delay methyl  
412 jasmonate-induced leaf senescence by up-regulating nitric oxide synthase activity. J.



- 413 Exp. Bot. 67(17), 5233-5245. doi: 10.1093/jxb/erw280
- 414 Jung, H. W., Tschaplinski, T. J., Wang, L., Glazebrook, J., Greenberg, J. T. (2009).  
415 Priming in systemic plant immunity. Science, 324(5923), 89-91. doi:  
416 10.1126/science.1170025
- 417 Hanaoka, H., Noda, T., Shirano, Y., Kato, T., Hayashi, H., Shibata, D., et al. (2002). Leaf  
418 senescence and starvation-induced chlorosis are accelerated by the disruption of an  
419 Arabidopsis autophagy gene. Plant Physiol. 129(3), 1181-1193. doi:  
420 10.1104/pp.011024
- 421 He, Y., Fukushige, H., Hildebrand, D.F., Gan, S. 2002. Evidence supporting a role of  
422 jasmonic acid in Arabidopsis leaf senescence. Plant Physiol. 128(3), 876-884. doi:  
423 10.1104/pp.010843
- 424 Hung, K.T., Kao, C.H. 2004. Hydrogen peroxide is necessary for abscisic acid-induced  
425 senescence of rice leaves. J. Plant Physiol. 161(12), 1347-1357. doi:  
426 10.1016/j.jplph.2004.05.011
- 427 Li, F., Chung, T., Vierstra, R. D. (2014). AUTOPHAGY-RELATED11 plays a critical role in  
428 general autophagy-and senescence-induced mitophagy in Arabidopsis. Plant Cell  
429 26(2), 788-807. doi: 10.1105/tpc.113.120014
- 430 Love, M. I., Huber, W., Anders, S. (2014). Moderated estimation of fold change and  
431 dispersion for RNA-seq data with DESeq2. Genome Biol. 15(12), 550. doi:  
432 10.1186/s13059-014-0550-8
- 433 Lim, P.O., Woo, H.R., & Nam, H.G. (2003). Molecular genetics of leaf senescence in  
434 Arabidopsis. Trends Plant Sci. 8(6), 272-278. doi: 10.1016/S1360-1385(03)00103-1
- 435 Lim, P.O., Kim, H.J., Nam, H.G. 2007. Leaf senescence. Annu. Rev. Plant Biol. 58, 115-  
436 136. doi: 10.1146/annurev.arplant.57.032905.105316
- 437 Masclaux, C., Valadier, M.H., Brugiere, N., Morot-Gaudry, J.F., Hirel, B. 2000.  
438 Characterization of the sink/source transition in tobacco (*Nicotiana tabacum* L.)  
439 shoots in relation to nitrogen management and leaf senescence. Planta 211, 510-  
440 518. doi: 10.1007/s004250000310
- 441 Miao Y., Zentgraf U. 2007. The antagonist function of Arabidopsis WRKY53 and  
442 ESR/ESP in leaf senescence is modulated by the jasmonic and salicylic acid  
443 equilibrium. Plant Cell 19, 819-830. doi: 10.1105/tpc.106.042705
- 444 Morris, K., Mackerness, S.A., Page, T., John, C.F., Murphy, A.M., et al. 2000. Salicylic  
445 acid has a role in regulating gene expression during senescence. Plant J. 23:677-  
446 685. doi: 10.1046/j.1365-313x.2000.00836.x
- 447 Pasternak, T., Groot, E. P., Kazantsev, F. V., Teale, W., Omelyanchuk, N., Kovrizhnykh,  
448 V., et al. (2019). Salicylic acid affects root meristem patterning via auxin distribution  
449 in a concentration-dependent manner. Plant Physiol. 180(3), 1725-1739. doi:  
450 10.1104/pp.19.00130
- 451 Quirino, B.F., Noh, Y.S., Himelblau, E., Amasino, R.M. (2000). Molecular aspects of leaf  
452 senescence. Trends Plant Sci. 5(7), 278-282. doi: 10.1016/S1360-1385(00)01655-1
- 453 Schippers, J.H. (2015). Transcriptional networks in leaf senescence. Curr. Opin. Plant  
454 Biol. 27, 77-83. doi: 10.1016/j.pbi.2015.06.018
- 455 Szklarczyk, D., Franceschini, A., Wyder, S., Forslund, K., Heller, D., Huerta-Cepas, J., et  
456 al. (2014). STRING v10: protein–protein interaction networks, integrated over the

- 457 tree of life. *Nucleic Acids Res.* 43(1), 447-452. doi: 10.1093/nar/gku1003
- 458 Thaler, J. S., Humphrey, P. T., & Whiteman, N. K. (2012). Evolution of jasmonate and  
459 salicylate signal crosstalk. *Trends Plant Sci.* 17(5), 260-270. doi:  
460 10.1016/j.tplants.2012.02.010
- 461 van der Graaff, E., Schwacke, R., Schneider, A., Desimone, M., Flugge, U.I., Kunze, R.  
462 2006. Transcription analysis of Arabidopsis membrane transporters and hormone  
463 pathways during developmental and induced leaf senescence. *Plant Physiol.*  
464 141:776-792. doi: 10.1104/pp.106.079293
- 465 Xiong, Y., Contento, A. L., Bassham, D. C. (2005). AtATG18a is required for the formation  
466 of autophagosomes during nutrient stress and senescence in Arabidopsis thaliana.  
467 *Plant J.* 42(4), 535-546. doi: 10.1111/j.1365-313X.2005.02397.x
- 468 Xiong, Y., Contento, A. L., Nguyen, P. Q., Bassham, D. C. (2007). Degradation of  
469 oxidized proteins by autophagy during oxidative stress in Arabidopsis. *Plant Physiol.*  
470 143(1), 291-299. doi: 10.1104/pp.106.092106
- 471 Yoshida, S. (2003). Molecular regulation of leaf senescence. *Curr. Opin. Plant Biol.* 6(1),  
472 79-84. doi: 10.1016/S1369526602000092
- 473 Yoshimoto, K., Jikumaru, Y., Kamiya, Y., Kusano, M., Consonni, C., Panstruga, R., et al.  
474 (2009). Autophagy negatively regulates cell death by controlling NPR1-dependent  
475 salicylic acid signaling during senescence and the innate immune response in  
476 Arabidopsis. *Plant Cell*, 21(9), 2914-2927. doi: 10.1105/tpc.109.068635
- 477 Yue, H., Nie, S., Xing, D. (2012). Over-expression of Arabidopsis Bax inhibitor-1 delays  
478 methyl jasmonate-induced leaf senescence by suppressing the activation of MAP  
479 kinase 6. *J. Exp. Bot.* 63(12), 4463-4474. doi: 10.1093/jxb/ers122
- 480 Zeng, L., Wang, Y., Zhou, J. (2016). Spectral analysis on origination of the bands at 437  
481 nm and 475.5 nm of chlorophyll fluorescence excitation spectrum in Arabidopsis  
482 chloroplasts. *Luminescence*, 31(3), 769-774. doi: 10.1002/bio.3022
- 483 Zhou, J., Sun, A., Xing, D. (2013). Modulation of cellular redox status by thiamine-  
484 activated NADPH oxidase confers Arabidopsis resistance to *Sclerotinia sclerotiorum*.  
485 *J. Exp. Bot.* 64(11), 3261-3272. doi: 10.1093/jxb/ert166
- 486 Zhou, J., Zeng, L., Liu, J., Xing, D. (2015). Manipulation of the xanthophyll cycle  
487 increases plant susceptibility to *Sclerotinia sclerotiorum*. *PLoS Pathog.* 11(5),  
488 e1004878. doi: 10.1371/journal.ppat.1004878
- 489 Zhuang, X., Wang, H., Lam, S. K., Gao, C., Wang, X., Cai, Y., Jiang, L. (2013). A BAR-  
490 domain protein SH3P2, which binds to phosphatidylinositol 3-phosphate and ATG8,  
491 regulates autophagosome formation in Arabidopsis. *Plant Cell*, 25(11), 4596-4615.  
492 doi: 10.1105/tpc.113.118307
- 493



494 **FIGURE LEGENDS**

495 **Figure 1. LCSA alleviates MeJA-induced leaf senescence.** (A) Phenotypes of detached  
496 leaves under LCSA and/or MeJA treatments. The 3rd and 4th rosette leaves were  
497 incubated in 3 mM MES buffer (pH 5.8) containing LCSA (10  $\mu$ M) or MeJA (50  $\mu$ M) alone  
498 or in combination (MeJA+LCSA) under continuous light for 5 d. (B and C) Measurement of  
499 the maximum quantum efficiency of photosystem II (PSII) photochemistry (Fv/Fm) (B) and  
500 total chlorophyll content (C) after LCSA and/or MeJA treatments. The percentages of  
501 Fv/Fm and chlorophyll content are relative to the initial levels at time zero. Data are the  
502 mean  $\pm$  SE of three independent experiments. Different letters indicate statistically  
503 significant differences between each treatment (Duncan's multiple range test,  $p < 0.05$ ).

504 **Figure 2. RNA-Seq analyses of differentially expressed genes (DEGs) in samples**  
505 **treated with LCSA, MeJA and LCSA+MeJA.** (A) Venn diagram showing the overlap of  
506 DEGs between LCSA, MeJA and LCSA+MeJA-treated samples. (B and C) The pathway  
507 enrichment analysis of up or down -regulated DEGs induced by MeJA alone (B) or  
508 LCSA+MeJA (C). (D) The heatmap showing expression of top 50 up-regulated and down-  
509 regulated DEGs between MeJA and MeJA+LCSA treatment group.

510 **Figure 3. Network analysis identifies distinct signal modules in the DEGs exclusively**  
511 **induced by LCSA+MeJA treatment.** (A) Interconnected clusters enriched among the 889  
512 genes and their interactions with neighboring genes. The autophagy specific module was  
513 drawn in a red dotted line. Genes are colored in red if they are induced and in blue if they  
514 are repressed. (B and C) Biological process (B) and molecular function (C) classification  
515 in gene ontology analysis of the DEGs that identified in coexpression networks.

516 **Figure 4. RT-qPCR confirmation of differentially expressed genes that involved in**  
517 **regulation of autophagy.** The relative mRNA expression levels were calculated using the  
518  $\Delta\Delta$ Ct method. The value of each ATG genes were relative to the initial levels at time zero  
519 of treatment. Data were the mean  $\pm$  SE of three independent experiments. Different letters  
520 in each genes indicate statistically significant differences between the treatments  
521 (Duncan's multiple range test,  $p < 0.05$ ).

522 **Figure 5. Defective in autophagy restrains the effect of SA on the senescence**  
523 **symptoms.** (A) Phenotypes of LCSA-alleviated senescence in Col-0 and autophagy  
524 defective mutants (*atg5-1* and *atg7-2*). Detached leaves from four-week-old Col-0, *atg5-1*,  
525 and *atg7-2* plants were transferred to MES buffer (pH 5.8) containing LCSA (10  $\mu$ M) or  
526 MeJA (50  $\mu$ M) or both MeJA and LCSA under continuous light and photographs were taken  
527 after 5 days of treatment. (B and C) Relative Fv/Fm (B) chlorophyll levels (C) in the leaves  
528 of the Col-0, *atg5-1*, and *atg7-2* described in (A). The data are means  $\pm$  SD ( $n = 3$ )  
529 calculated from three biological replicates. Different letters indicate statistically significant  
530 differences between the treatments (Duncan's multiple range test,  $p < 0.05$ ).

531 **Figure 6. LCSA enhances the formation of autophagosomes upon MeJA-induced**  
532 **leaf senescence.** (A) Microscopic analyses of autophagosome-related structures in the  
533 eYFP-ATG8e plant under LCSA or MeJA or both MeJA and LCSA treatment. Bar, 20  $\mu$ m.  
534 (B) Statistical analysis of the puncta numbers displayed in (A). The number of puncta was

535 calculated per 0.01 mm<sup>2</sup> from at least 15 pictures. Different letters indicate statistically  
536 significant differences between the treatments (Duncan's multiple range test, p<0.05). (C)  
537 Immunoblot analysis of eYFP-ATG8 processing. Crude extracts were subjected to SDS-  
538 PAGE and immunoblot analysis with anti-GFP antibodies. The amount of protein loaded  
539 per lane was stained by ponceau S.

#### 540 **SUPPLEMENTARY MATERIALS**

541 **Figure S1. Network analysis identifies gene modules in the DEGs induced by MeJA.**  
542 Protein modules were identified using ClusterONE, a cluster screen method considering  
543 the overlapping neighbor extension. The protein modules including five or more than five  
544 members and having connection density over 0.5 are defined as modules.

545 **Figure S2. Network analysis identifies gene modules in the DEGs induced by MeJA**  
546 **together with LCSA.** Protein modules were identified using ClusterONE. The protein  
547 modules including at least five members and having connection density over 0.5 are  
548 defined as modules.

549 **Figure S3. Gene modules exclusively induced by MeJA.** After removal of the same  
550 modules in MeJA+LCSA treatment group, six gene modules specially induced by MeJA  
551 were obtained.

552 **Figure S4. Effect of different concentrations of SA on autophagic puncta induction.**  
553 (A) Microscopic analyses of autophagic structures in the eYFP-ATG8e plant under 0, 10  
554 and 100 M SA treatment. Bar, 20 μm. (B) Statistical analysis of the puncta numbers  
555 displayed in (A). The number of puncta was calculated per 0.01 mm<sup>2</sup> from at least 15  
556 pictures. Asterisks indicate a significant difference according to Student's t-test, \*\*P<0.01.

557 **Table S1. Genes list for enriched modules in the DEGs induced by MeJA and MeJA**  
558 **together with LCSA.**

559 **Table S2. Primers used for RT-qPCR.** F, Forward; R, Reverse.

560

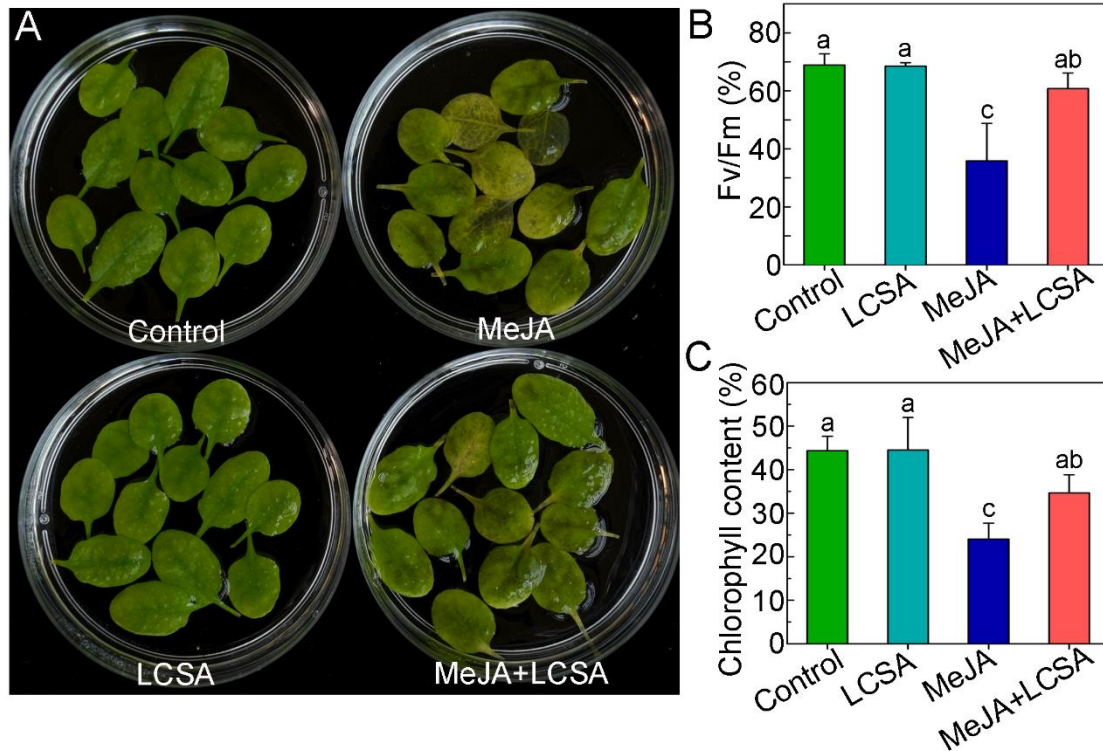

561

562 **Figure 1. LCSA alleviates MeJA-induced leaf senescence.** (A) Phenotypes of detached  
563 leaves under LCSA and/or MeJA treatments. The 3rd and 4th rosette leaves were  
564 incubated in 3 mM MES buffer (pH 5.8) containing LCSA (10  $\mu$ M) or MeJA (50  $\mu$ M) alone  
565 or in combination (MeJA+LCSA) under continuous light for 5 d. (B and C) Measurement of  
566 the maximum quantum efficiency of photosystem II (PSII) photochemistry (Fv/Fm) (B) and  
567 total chlorophyll content (C) after LCSA and/or MeJA treatments. The percentages of  
568 Fv/Fm and chlorophyll content are relative to the initial levels at time zero. Data are the  
569 mean  $\pm$  SE of three independent experiments. Different letters indicate statistically  
570 significant differences between each treatment (Duncan's multiple range test,  $p < 0.05$ ).

571

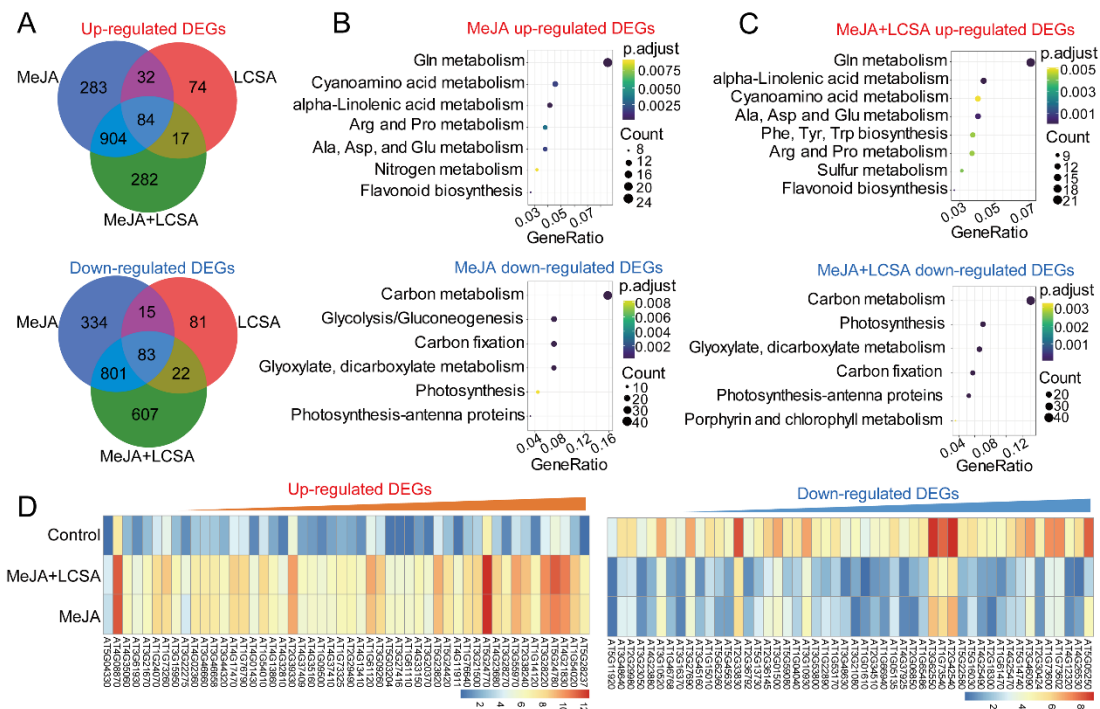

572  
573  
574  
575  
576  
577  
578  
579

**Figure 2. RNA-Seq analyses of differentially expressed genes (DEGs) in samples treated with LCSA, MeJA and LCSA+MeJA.** (A) Venn diagram showing the overlap of DEGs between LCSA, MeJA and LCSA+MeJA-treated samples. (B and C) The pathway enrichment analysis of up or down -regulated DEGs induced by MeJA alone (B) or LCSA+MeJA (C). (D) The heatmap showing expression of top 50 up-regulated and down-regulated DEGs between MeJA and MeJA+LCSA treatment group.

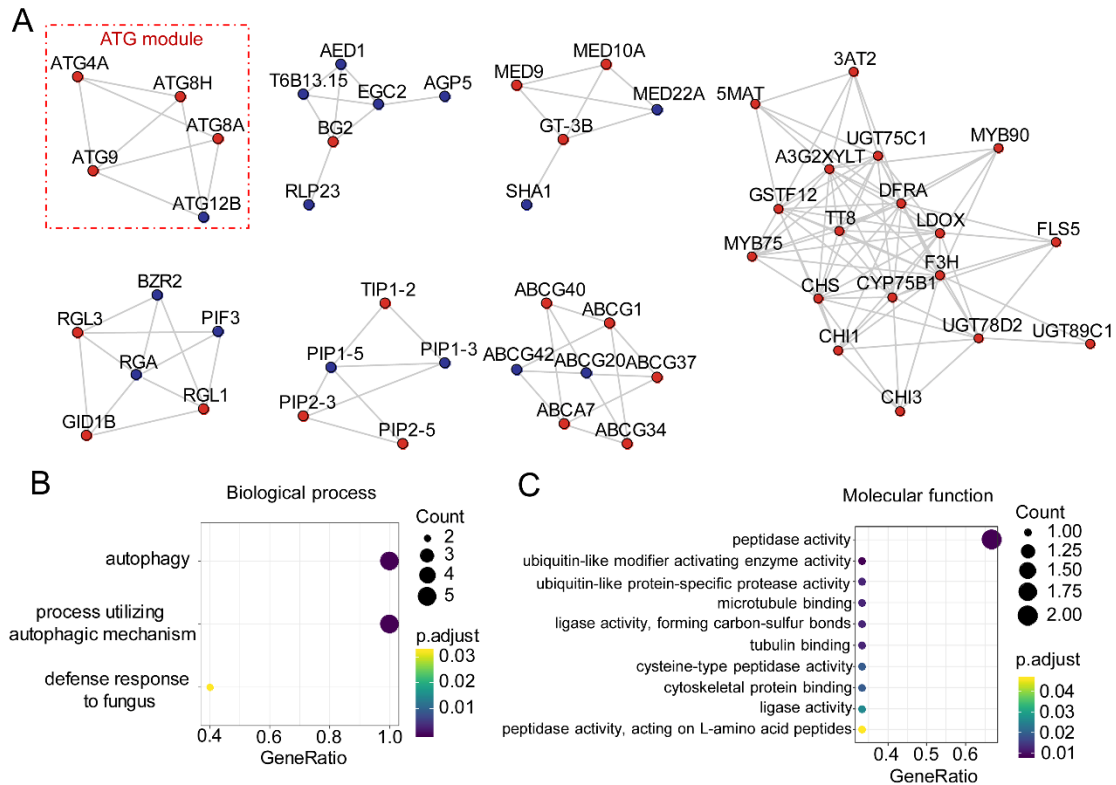

580

581

**Figure 3. Network analysis identifies distinct signal modules in the DEGs**

582

**exclusively induced by LCSA+MeJA treatment. (A)** Interconnected clusters enriched

583

among the 889 genes and their interactions with neighboring genes. The autophagy

584

specific module was drawn in a red dotted line. Genes are colored in red if they are

585

induced and in blue if they are repressed. (B and C) Biological process (B) and molecular

586

function (C) classification in gene ontology analysis of the DEGs that identified in

587

coexpression networks.

588

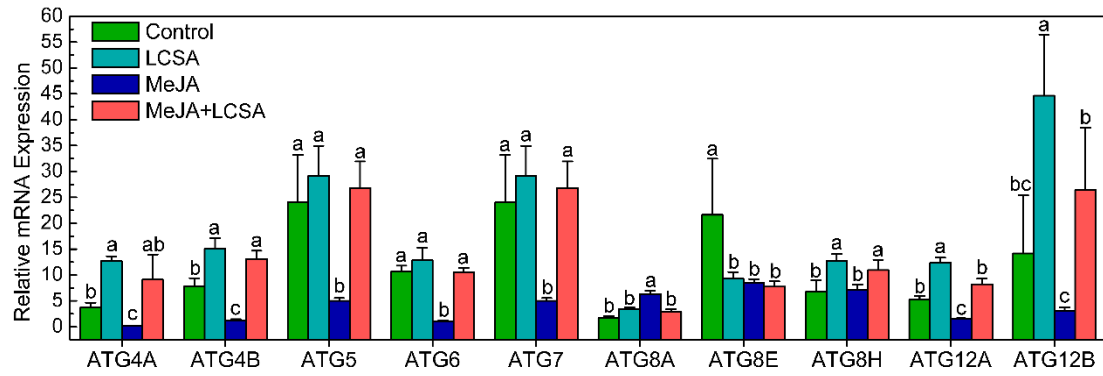

589

590

591

592

593

594

595

596

**Figure 4. RT-qPCR confirmation of differentially expressed genes that involved in regulation of autophagy.** The relative mRNA expression levels were calculated using the  $\Delta\Delta C_t$  method. The value of each ATG genes were relative to the initial levels at time zero of treatment. Data were the mean  $\pm$  SE of three independent experiments. Different letters in each genes indicate statistically significant differences between the treatments (Duncan's multiple range test,  $p < 0.05$ ).



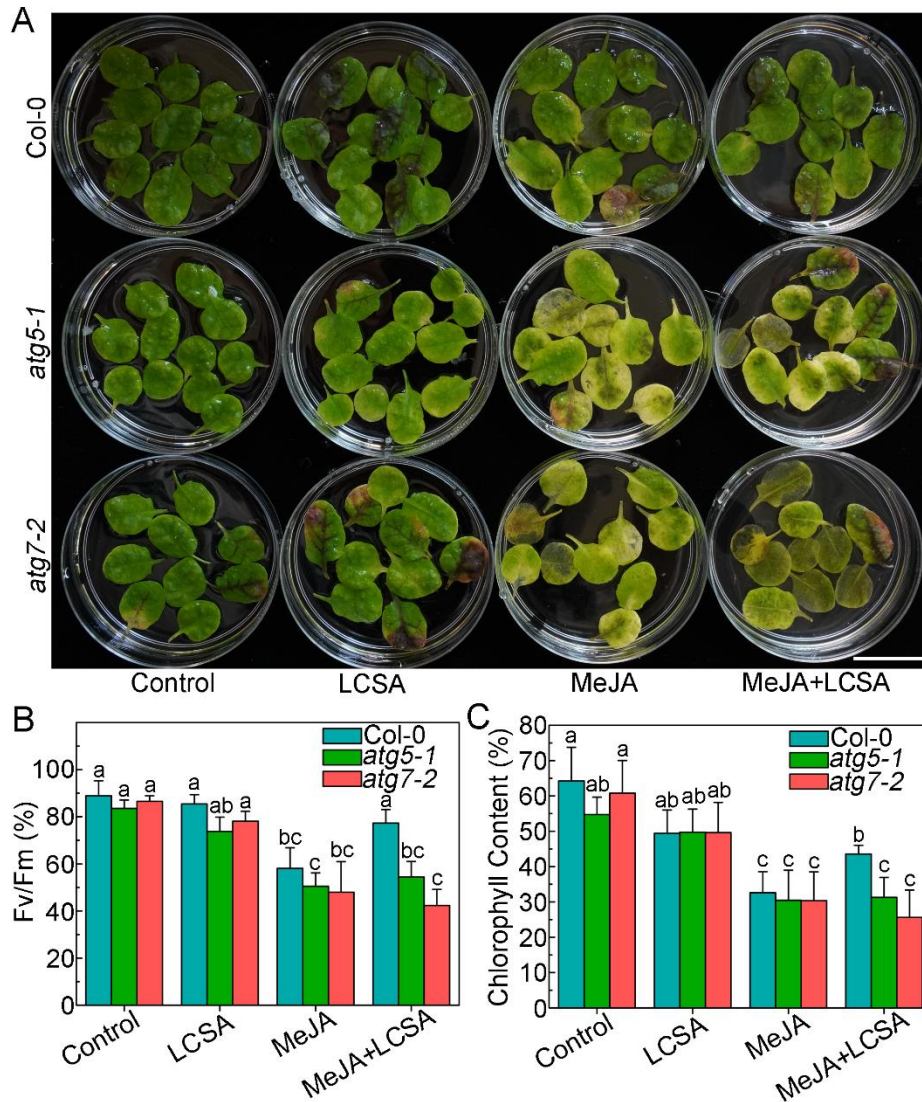

597

598

599

600

601

602

603

604

605

606

607

**Figure 5. Defective in autophagy restrains the effect of SA on the senescence**

**symptoms.** (A) Phenotypes of LCSA-alleviated senescence in Col-0 and autophagy defective mutants (*atg5-1* and *atg7-2*). Detached leaves from four-week-old Col-0, *atg5-1*, and *atg7-2* plants were transferred to MES buffer (pH 5.8) containing LCSA (10  $\mu$ M) or MeJA (50  $\mu$ M) or both MeJA and LCSA under continuous light and photographs were taken after 5 days of treatment. (B and C) Relative Fv/Fm (B) chlorophyll levels (C) in the leaves of the Col-0, *atg5-1*, and *atg7-2* described in (A). The data are means  $\pm$  SD (n = 3) calculated from three biological replicates. Different letters indicate statistically significant differences between the treatments (Duncan's multiple range test, p<0.05).



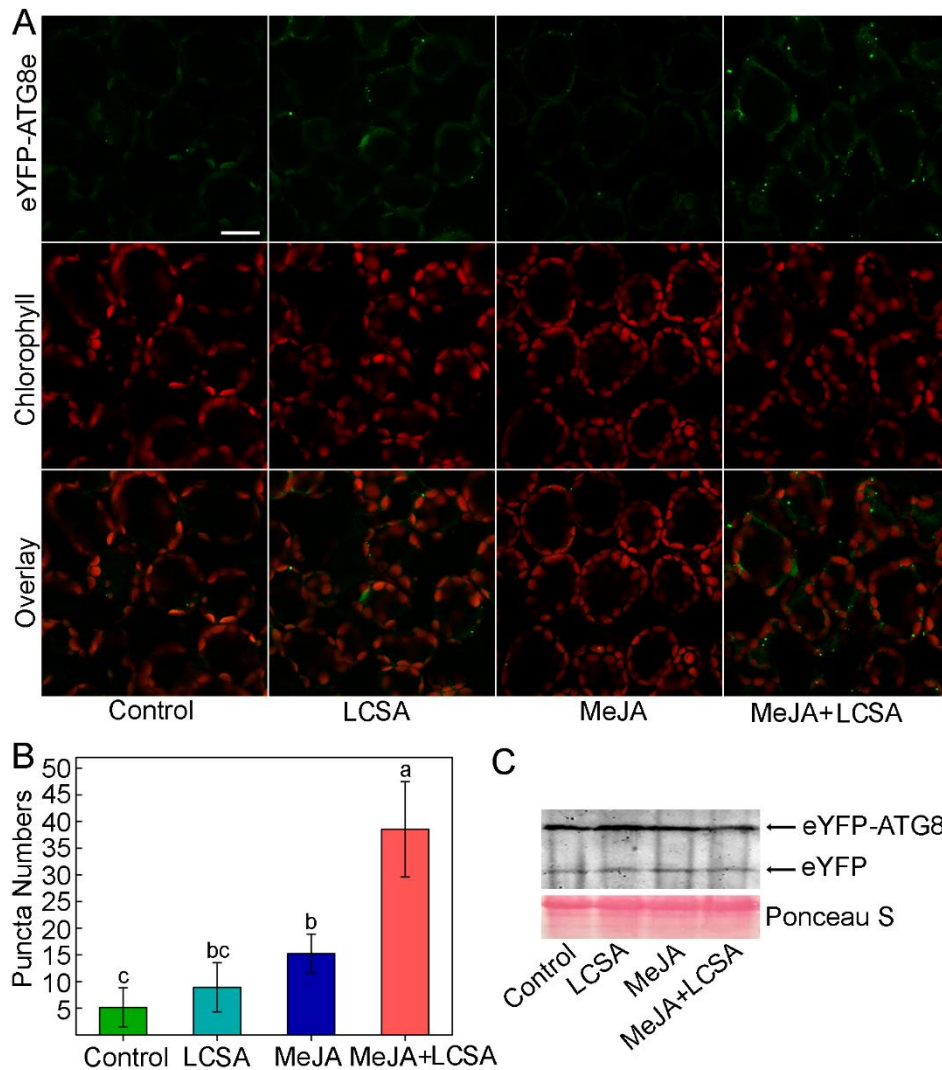

608

609 **Figure 6. LCSA enhances the formation of autophagosomes upon MeJA-induced**

610 **leaf senescence.** (A) Microscopic analyses of autophagosome-related structures in the

611 eYFP-ATG8e plant under LCSA or MeJA or both MeJA and LCSA treatment. Bar, 20  $\mu$ m.

612 (B) Statistical analysis of the puncta numbers displayed in (A). The number of puncta was

613 calculated per 0.01 mm<sup>2</sup> from at least 15 pictures. Different letters indicate statistically

614 significant differences between the treatments (Duncan's multiple range test,  $p < 0.05$ ).

615 (C) Immunoblot analysis of eYFP-ATG8 processing. Crude extracts were subjected to SDS-

616 PAGE and immunoblot analysis with anti-GFP antibodies. The amount of protein loaded

617 per lane was stained by ponceau S.

618

619 **SUPPLEMENTARY MATERIALS**

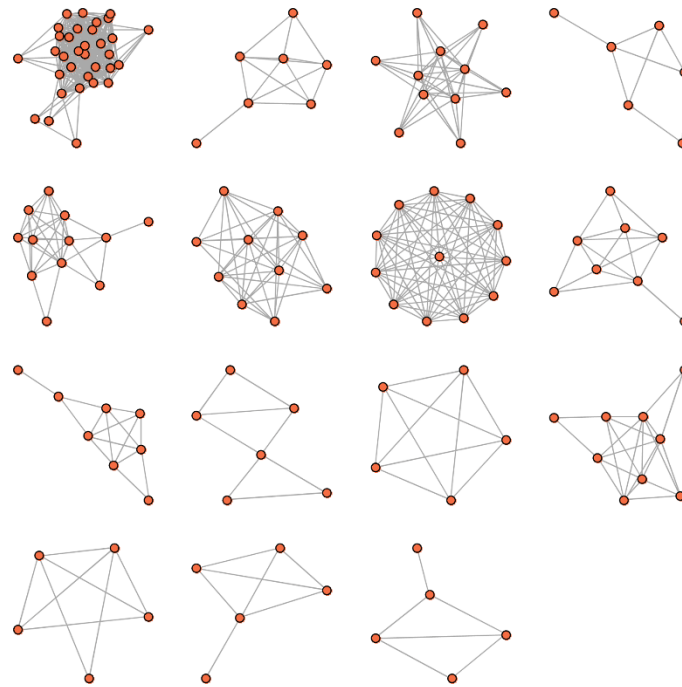

620

621 **Figure S1. Network analysis identifies gene modules in the DEGs induced by MeJA.**

622 Protein modules were identified using ClusterONE, a cluster screen method considering

623 the overlapping neighbor extension. The protein modules including five or more than five

624 members and having connection density over 0.5 are defined as modules.

625

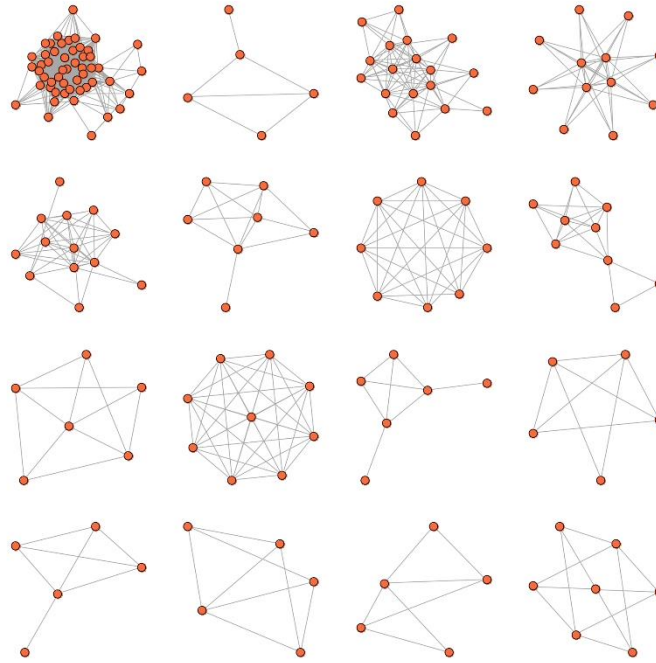

626

627 **Figure S2. Network analysis identifies gene modules in the DEGs induced by MeJA**  
628 **together with LCSA.** Protein modules were identified using ClusterONE. The protein  
629 modules including at least five members and having connection density over 0.5 are  
630 defined as modules.

631

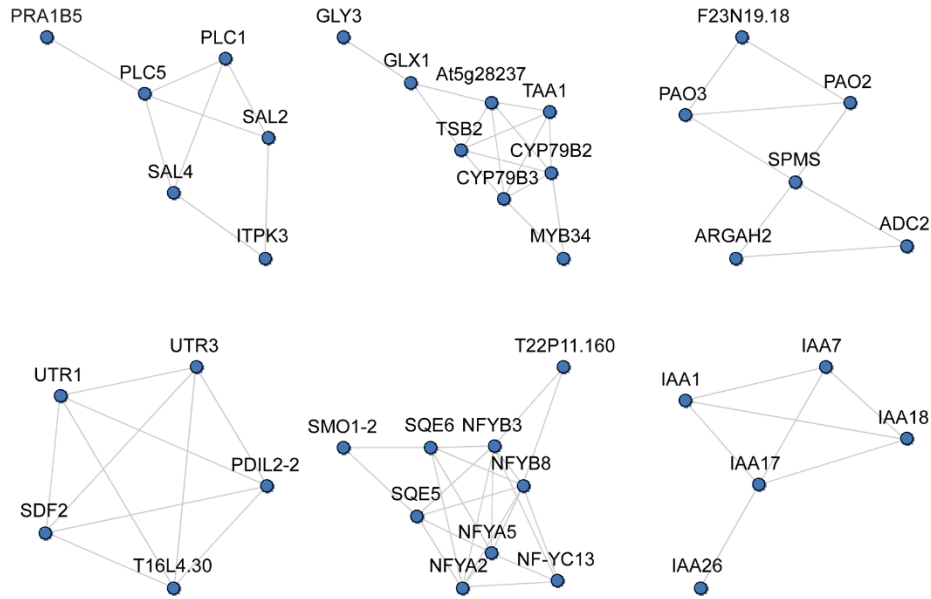

632

633 **Figure S3. Gene modules exclusively induced by MeJA.** After removal of the same  
634 modules in MeJA+LCSA treatment group, six gene modules specially induced by MeJA  
635 were obtained.

636

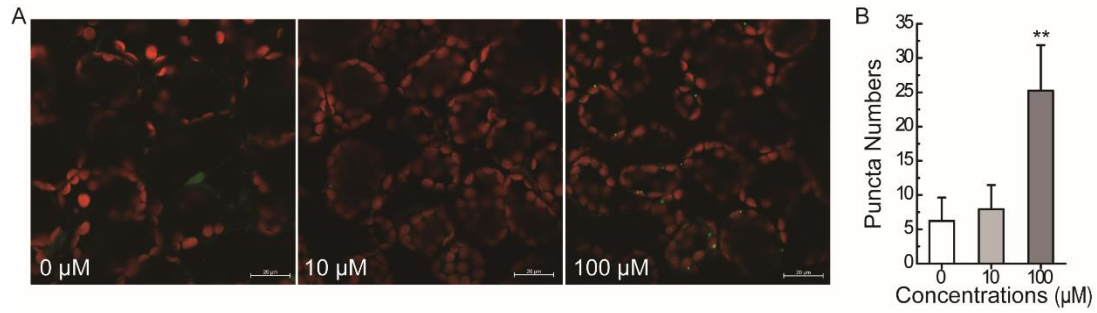

637

638

**Figure S4. Effect of different concentrations of SA on autophagic puncta induction.**

639

(A) Microscopic analyses of autophagic structures in the eYFP-ATG8e plant under 0, 10

640

and 100 M SA treatment. Bar, 20 μm. (B) Statistical analysis of the puncta numbers

641

displayed in (A). The number of puncta was calculated per 0.01 mm<sup>2</sup> from at least 15

642

pictures. Asterisks indicate a significant difference according to Student's t-test, \*\*P<0.01.

643

644 **Table S1. Genes list for enriched modules in the DEGs induced by MeJA and MeJA**  
 645 **together with LCSA.**

| Modules     | Enriched genes in each module |           |           |           |           |
|-------------|-------------------------------|-----------|-----------|-----------|-----------|
| MeJA_1      | AT1G64200                     | ATCG00120 | ATCG00480 | ATCG00140 | ATCG00190 |
|             | ATCG00740                     | ATCG00170 | ATCG00340 | AT3G48850 | ATCG00660 |
|             | ATCG01070                     | ATCG01110 | ATCG00420 | ATCG01050 | ATCG00490 |
|             | AT5G24120                     | ATCG00280 | ATCG00510 | AT5G13730 | ATCG01010 |
|             | ATCG01100                     | ATMG01320 | ATCG00570 | ATCG00550 | ATCG00710 |
|             | ATCG00210                     | AT5G13490 | ATCG00560 | ATCG00040 | ATCG00590 |
|             | ATCG00760                     | ATCG00300 | ATCG00700 |           |           |
| MeJA_2      | AT4G36990                     | AT3G24520 | AT3G51910 | AT3G53230 | AT5G37670 |
|             | AT2G20560                     | AT1G08650 |           |           |           |
| MeJA_3      | AT3G50740                     | AT4G36220 | AT5G04330 | AT3G19450 | AT4G37990 |
|             | AT1G71695                     | AT5G64120 | AT3G49120 | AT4G21960 | AT4G08770 |
|             | AT5G06720                     |           |           |           |           |
| MeJA_4      | AT5G58690                     | AT5G58670 | AT5G01640 | AT4G08170 | AT5G64000 |
|             | AT5G09290                     |           |           |           |           |
| MeJA_5      | AT1G30135                     | AT1G74950 | AT5G13220 | AT3G17860 | AT1G70700 |
|             | AT1G17380                     | AT3G43440 | AT2G27690 | AT2G34600 | AT5G05600 |
|             | AT1G44350                     | AT5G63450 |           |           |           |
| MeJA_6      | AT3G29320                     | AT5G64860 | AT5G04360 | AT3G20440 | AT2G36390 |
|             | AT5G51820                     | AT1G76130 | AT4G25000 | AT2G39930 | AT4G00490 |
| MeJA_7      | AT3G48360                     | AT3G26230 | AT3G26300 | AT4G37400 | AT1G13100 |
|             | AT4G37310                     | AT5G57220 | AT4G37320 | AT4G37430 | AT5G36220 |
|             | AT3G53280                     | AT4G37410 |           |           |           |
| MeJA_8      | AT1G19670                     | AT5G43860 | AT4G13250 | AT5G13800 | AT4G22920 |
|             | AT3G44880                     | AT3G10520 | AT4G11910 |           |           |
| MeJA_9      | AT1G70560                     | AT1G11840 | AT5G28237 | AT4G27070 | AT1G53580 |
|             | AT4G39950                     | AT2G22330 | AT5G60890 |           |           |
| MeJA_10     | AT5G53120                     | AT1G62810 | AT2G43020 | AT3G59050 | AT4G08870 |
|             | AT4G34710                     |           |           |           |           |
| MeJA_11     | AT1G04980                     | AT1G14360 | AT2G02810 | AT2G25110 | AT4G29520 |
| MeJA_12     | AT5G02570                     | AT5G43250 | AT4G22756 | AT5G24160 | AT5G24150 |
|             | AT4G14540                     | AT2G37060 | AT3G05690 | AT1G54160 |           |
| MeJA_13     | AT1G02470                     | AT2G43018 | AT3G59052 | AT5G10690 | AT2G06005 |
| MeJA_14     | AT1G51950                     | AT3G23050 | AT1G04250 | AT4G14560 | AT3G16500 |
| MeJA_15     | AT1G52400                     | AT4G19230 | AT3G16470 | AT1G52410 | AT5G24780 |
| MeJA+LCSA_1 | ATCG00470                     | ATCG00130 | AT2G25610 | AT1G64200 | ATCG00120 |
|             | ATCG00480                     | ATCG00150 | ATCG00140 | ATCG00770 | ATCG00740 |
|             | ATCG00170                     | ATCG00670 | ATCG00020 | ATCG00630 | ATCG01060 |
|             | AT3G48850                     | ATCG00650 | ATCG00660 | ATCG00640 | ATCG01070 |
|             | ATCG00430                     | ATCG00420 | ATCG01080 | ATCG01050 | ATCG00490 |
|             | ATCG00540                     | ATCG00080 | ATCG00580 | ATCG00070 | ATCG00510 |
|             | AT1G16780                     | AT3G27240 | AT3G53920 | ATCG01100 | AT2G07689 |

|              |                                                                                                                                                                                              |
|--------------|----------------------------------------------------------------------------------------------------------------------------------------------------------------------------------------------|
|              | ATCG00440 ATCG01040 ATCG01020 ATCG00570 ATCG00550<br>ATCG00360 ATCG00520 ATCG00710 ATCG00210 AT5G13490<br>ATCG00220 ATCG00560 ATCG00040 ATCG00590 ATCG00760<br>ATCG00530 ATCG00700           |
| MeJA+LCSA_2  | AT1G52400 AT4G19230 AT3G16470 AT1G52410 AT5G24780                                                                                                                                            |
| MeJA+LCSA_3  | AT1G03495 AT4G14090 AT5G42800 AT5G54060 AT5G17220<br>AT3G29590 AT1G06000 AT3G51240 AT5G17050 AT5G13930<br>AT4G09820 AT4G22880 AT5G07990 AT5G63600 AT1G56650<br>AT1G66390 AT5G05270 AT3G55120 |
| MeJA+LCSA_4  | AT1G14540 AT5G40150 AT3G50740 AT4G36220 AT5G04330<br>AT4G37990 AT1G14550 AT1G71695 AT5G64120 AT3G49120<br>AT4G21960 AT5G05340                                                                |
| MeJA+LCSA_5  | AT1G01260 AT1G30135 AT1G74950 AT1G72450 AT5G13220<br>AT3G17860 AT1G70700 AT1G17380 AT2G27690 AT2G34600<br>AT5G05600 AT1G44350 AT5G63450                                                      |
| MeJA+LCSA_6  | AT1G19670 AT4G13250 AT5G13800 AT4G22920 AT3G44880<br>AT3G10520 AT4G11910                                                                                                                     |
| MeJA+LCSA_7  | AT3G29320 AT5G64860 AT2G36390 AT5G03650 AT1G76130<br>AT4G25000 AT2G39930 AT4G00490                                                                                                           |
| MeJA+LCSA_8  | AT4G36990 AT3G24520 AT3G51910 AT1G77570 AT3G53230<br>AT1G57870 AT1G08650 AT1G73570 AT1G65040                                                                                                 |
| MeJA+LCSA_9  | AT1G09530 AT1G19350 AT2G01570 AT5G17490 AT1G66350<br>AT3G63010                                                                                                                               |
| MeJA+LCSA_10 | AT3G26230 AT2G30750 AT4G37310 AT3G26220 AT5G57220<br>AT4G37320 AT4G37430 AT5G36220 AT4G37410                                                                                                 |
| MeJA+LCSA_11 | AT1G35230 AT2G18660 AT5G10760 AT3G57260 AT2G14610<br>AT2G32680                                                                                                                               |
| MeJA+LCSA_12 | AT1G02470 AT2G43018 AT3G59052 AT5G10690 AT1G51402                                                                                                                                            |
| MeJA+LCSA_13 | AT1G16430 AT5G41910 AT2G38250 AT1G55080 AT5G63780                                                                                                                                            |
| MeJA+LCSA_14 | AT4G21980 AT3G06420 AT2G44140 AT2G31260 AT3G13970                                                                                                                                            |
| MeJA+LCSA_15 | AT1G01620 AT4G23400 AT3G26520 AT2G37180 AT3G54820                                                                                                                                            |
| MeJA+LCSA_16 | AT2G39350 AT3G47780 AT3G53510 AT1G15520 AT4G15233<br>AT2G36380 AT3G53480                                                                                                                     |

646

647



648 **Table S2. Primers used for RT-qPCR.** F, Forward; R, Reverse.

| Primer name | Sequence (5'--->3')    |
|-------------|------------------------|
| Actin2-F    | GGCAAGTCATCACGATTGG    |
| Actin2-R    | CAGCTTCCATTCCCACAAAC   |
| ATG4A-F     | GGCTGCATTGCAACTAGATTT  |
| ATG4A-R     | GAATCATGCAACCCCAGTTC   |
| ATG4B-F     | CTTTCACGTTCCCTCAAAGC   |
| ATG4B-R     | TTGCAATGGTAAGACGATGTG  |
| ATG5-F      | GACAGCAAGAATTCCTGTTCG  |
| ATG5-R      | GGAACTCAACAGGGCGATTA   |
| ATG6-F      | GCCATGACACTGTATTTGATG  |
| ATG6-R      | TGGTCCAACCTCTCTTGCTTG  |
| ATG7-F      | GTACCGCTTGCTCTGAAACC   |
| ATG7-R      | GTCTTCCCAGTCGAGGTTGA   |
| ATG8A-F     | CAATTTGTATACGTGGTTCGT  |
| ATG8A-R     | AGCAACGGTAAGAGATCCAA   |
| ATG8E-F     | GGAAGCATCTTTAAGATGGACA |
| ATG8E-R     | CTCAGCCTTTTCCACAATCA   |
| ATG8H-F     | CAAAGCTCTCTTTGTTTTCG   |
| ATG8H-R     | AAGAACCCGTCTTCTTCCTTG  |
| ATG12A-F    | CGAGCTCTGTTTCGAAAGTT   |
| ATG12A-R    | CAACGAATCAGAATGAAGCTG  |
| ATG12B-F    | CCGAATCTCCGAATTCTGTT   |
| ATG12B-R    | GCAAACCTTGCTCACTCCCTGA |

649
